# Supplementary material for: Continuous, complete and comparable NT-proBNP reference ranges in healthy children
Source: publisher site journal article supplement (doi:10.1515/cclm-2019-1185), 2020-04-18
Supplement: Supplementary file 1 [file Supplemental Table 1.docx]

| **Age** | **Calculated**  **reference intervals** | | **Nir et al.** | **Age interval** |
| --- | --- | --- | --- | --- |
| **2.5%tile** | **97.5%tile** | **97.5%tile** |
| Birth | - | - | 13,222 | 0 - 2 d |
| 1 d | 470 | 14,488 |
| 2 d | 328 | 10,209 |
| 3 d | 266 | 8,319 | 6,502 | 3 - 11 d |
| 5 d | 204 | 6,427 |
| 7 d | 171 | 5,423 |
| 9 d | 150 | 4,776 |
| 11 d | 135 | 4,316 |
| 12 d | 129 | 4,131 | - | 12 d to ≤ 1 mo |
| 18 d | 105 | 3,366 |
| 24 d | 90 | 2,911 |
| 1 mo | 80 | 2,600 |
| 2 mo | 56 | 1,817 | 1,000 | > 1 mo to ≤ 1 yr |
| 4 mo | 39 | 1,281 |
| 8 mo | 27 | 902 |
| 12 mo | 22 | 736 |
| 1¼ yr | 20 | 657 | 675 | > 1 to ≤ 2 yr |
| 1½ yr | 18 | 600 |
| 1¾ yr | 16 | 555 |
| 2 yr | 15 | 518 |
| 3 yr | 12 | 423 | 327 | > 2 to ≤ 6 yr |
| 4 yr | 11 | 365 |
| 5 yr | 10 | 327 |
| 6 yr | 9 | 298 |
| 8 yr | 7 | 258 | 242 | > 6 to ≤ 14 yr |
| 10 yr | 7 | 230 |
| 12 yr | 6 | 210 |
| 14 yr | 6 | 194 |
| 15 yr | 5 | 187 | 207 | > 14 to ≤ 18 yr |
| 16 yr | 5 | 181 |
| 17 yr | 5 | 176 |
| 18 yr | 5 | 171 |

**Supplemental Table 1:** Reference intervals of NT-proBNP [pg/ml] with upper (97.5th percentile) and lower limit (2.5th percentile) in different age groups. Calculated limits for discrete ages according to continuous RI equations are compared to Nir et al. [4] original interval data. For the discrete intervals, the 2.5th percentile is missing entirely and no data are available for the age of 12 to 30 days.
